# Supplementary material for: The miR-25-93-106b cluster regulates tumor metastasis and immune evasion via modulation of CXCL12 and PD-L1
Source: PubMed Central journal article supplement (PMC5400610; doi:10.18632/oncotarget.15450), 2017-02-17
Supplement: oncotarget-08-21609-s001.pdf [file oncotarget-08-21609-s001.pdf]

## The miR-25-93-106b cluster regulates tumor metastasis and immune evasion via modulation of CXCL12 and PD-L1

### SUPPLEMENTARY FIGURES AND TABLE

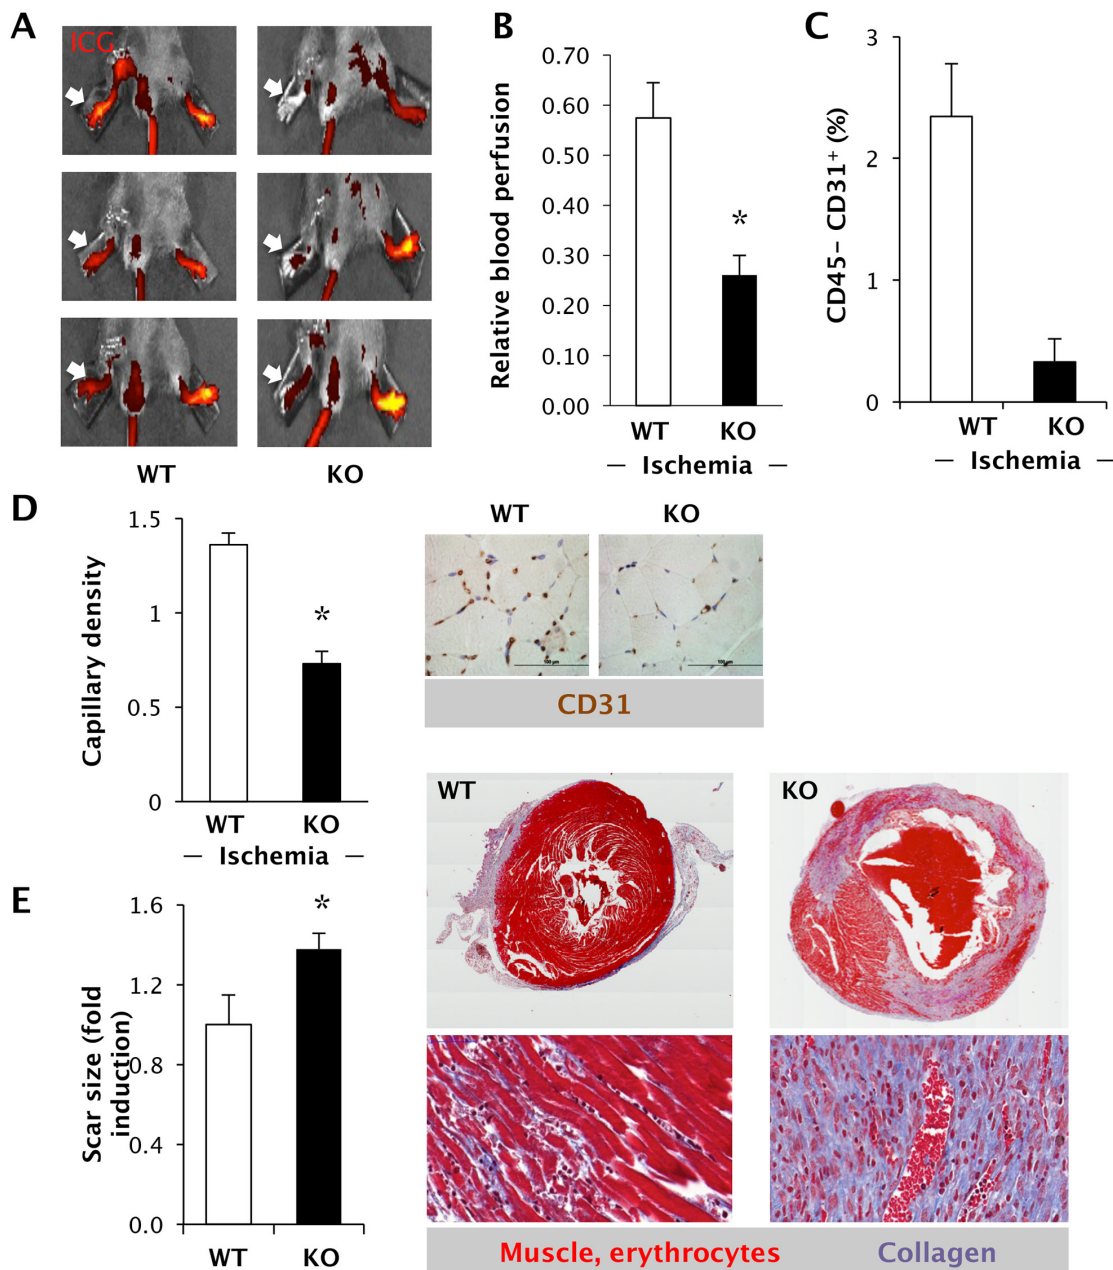

**Supplementary Figure 1: Induction of hindlimb / myocardial ischemia in WT and miR-25-93-106b KO mice.** **A.** Assessment of ischemia induction by indocyanine green (ICG) and visualization by *in vivo* fluorescence imaging (IVIS). Arrows indicate ischemic hindlimb. **B.** Quantification of relative blood perfusion;  $n=6-7$ , \*  $p<0.05$ . **C.** Quantification of CD31<sup>+</sup>CD45<sup>-</sup> endothelial cells in homogenized ischemic muscles by flow cytometry. **D. Left:** Quantification of capillary density (number of CD31<sup>+</sup> capillaries/myocyte);  $n=12$ , \*  $p<0.05$ . **Right:** Representative IHC for CD31 expression in cross-sections of ischemic adductor muscles. **E. Left:** Quantification of myocardial scar size;  $n=3-4$  \*  $p<0.05$ . **Right:** Overview (**upper**) and higher magnification (**lower**) of transversely sectioned hearts one week after onset of infarction by Masson's trichrome stain to visualize blue collagen deposition.

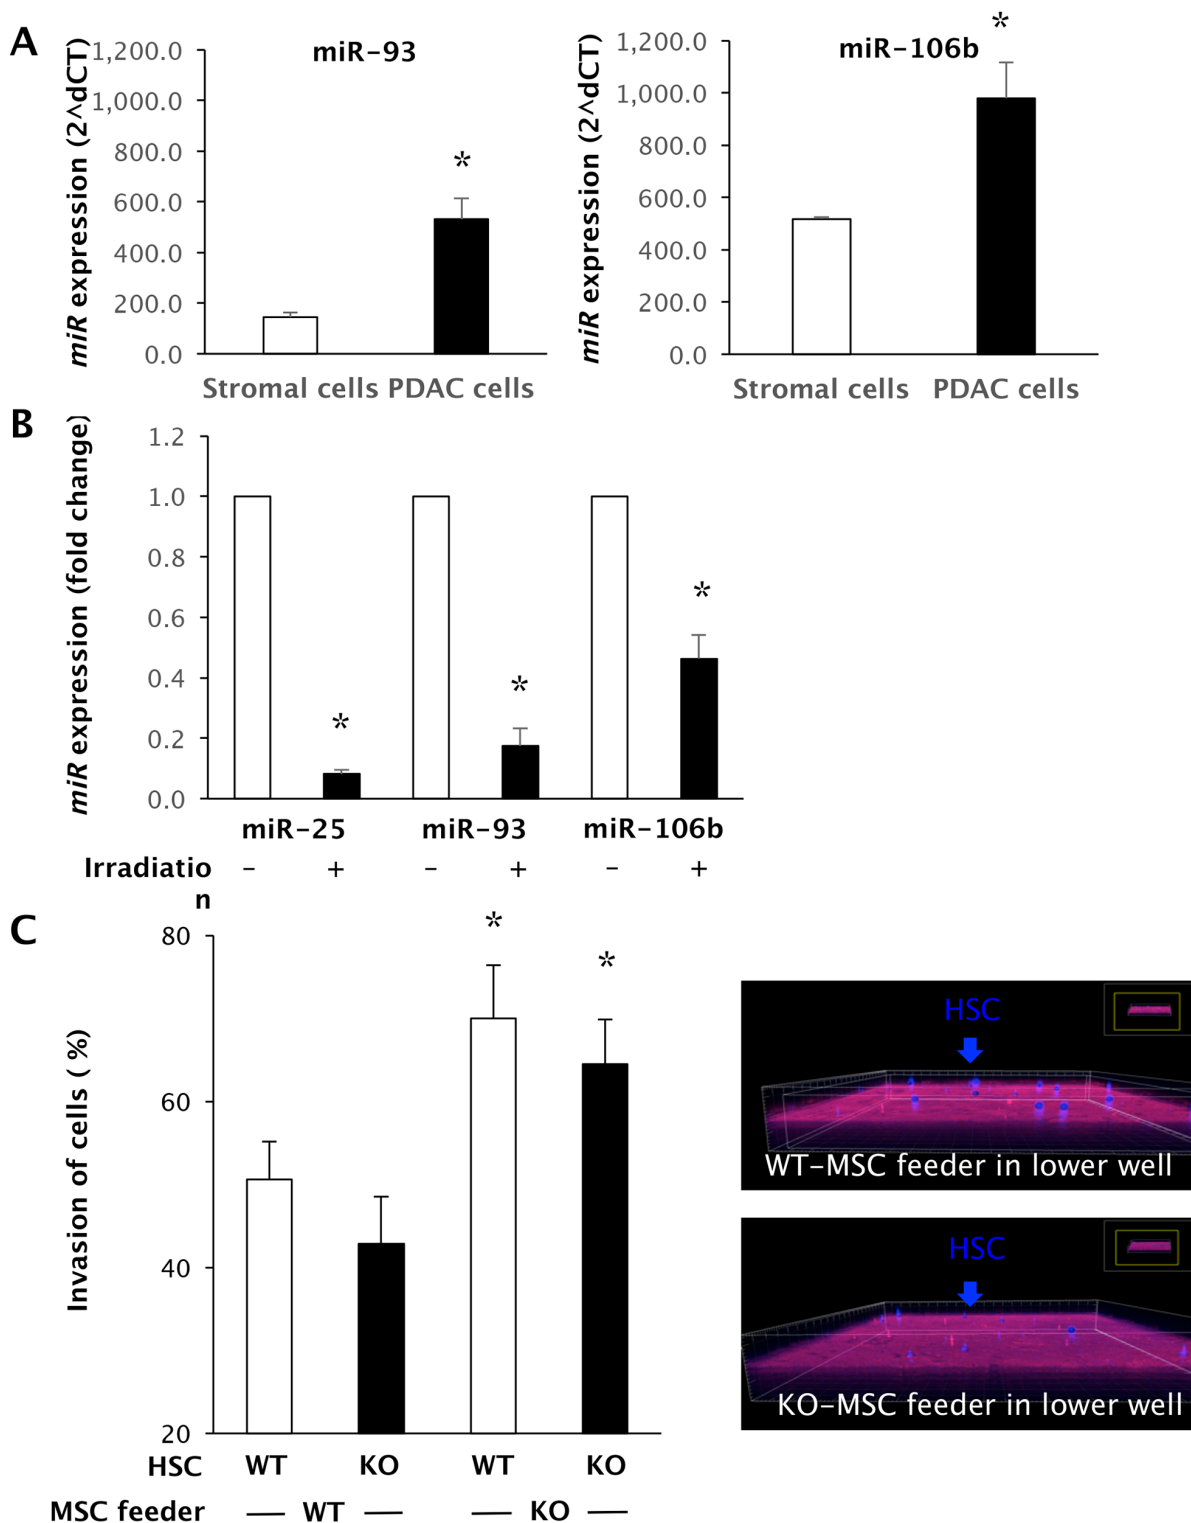

**Supplementary Figure 2: Role of the miR-25-93-106b cluster in the bone marrow niche.** A. Expression of members of the miR-25-93-106b cluster in primary tumour stromal cells versus cancer cells; n=4-5, \*p<0.05. B. *In vivo* expression of members of the miR-25-93-106b cluster in BM cells with or without irradiation; n=4, \*p<0.05, 6 hours following irradiation. C. Knockout of the miR-25-93-106b cluster in the bone marrow niche enhances invasion of hematopoietic CD45<sup>c</sup>-kit<sup>+</sup> cells (HSC) *in vitro*, n=12-13, \* p<0.05.

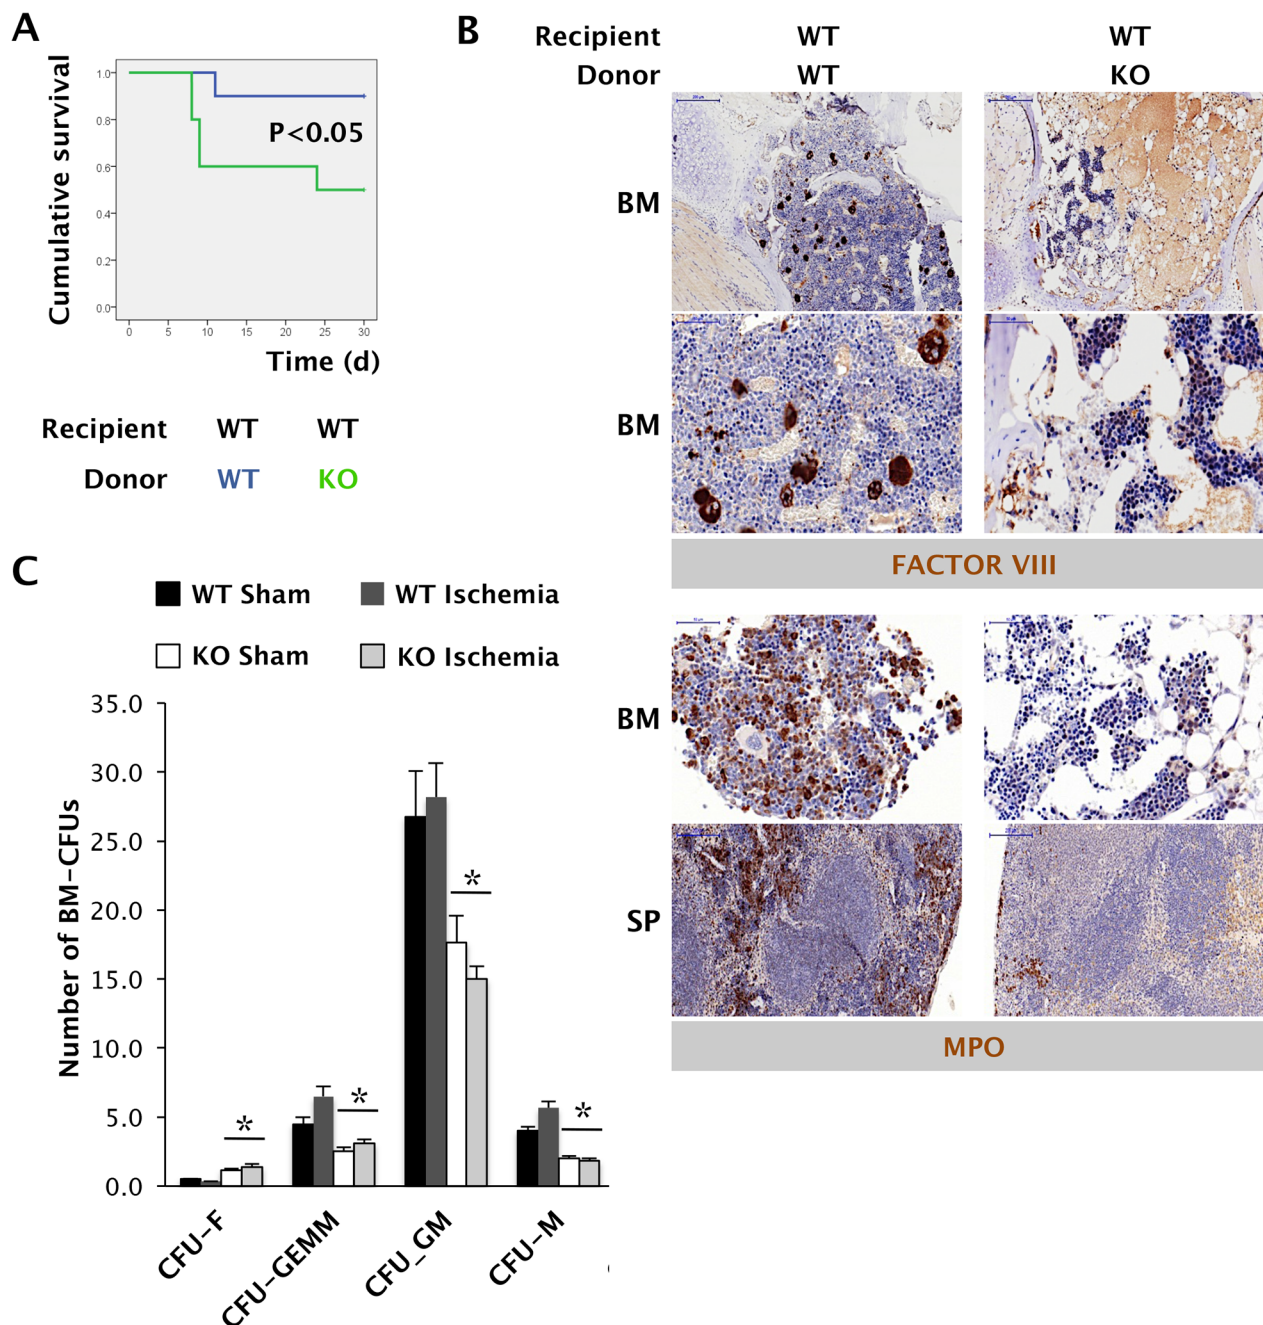

**Supplementary Figure 3: Dysregulated hematopoiesis in miR-25-93-106b KO bone marrow cells after low dose transplantation of miR-25-93-106b KO vs. WT bone marrow (BM) into irradiated WT recipients.** **A.** Kaplan-Meier curves of recipient WT mice following BM transplantation (Tx) with 100,000 miR-25-93-106b KO or WT BM cells; quantification (n=10, \* p<0.05). **B.** Representative IHC of BM sternal segments after BM Tx. Upper panel: Staining for factor VIII (FVIII) identifying cells of the megakaryocyte lineage. Low (top) and high (bottom) magnification. Lower panel: Staining for myeloperoxidase (MPO) identifying neutrophilic granulocytes in the BM (top) and in the spleen (SP, bottom). **C.** Colony-forming units (CFU) based on 10<sup>3</sup> CD45<sup>+</sup>c-KIT<sup>+</sup> HSC derived from miR-25-93-106b KO or WT BM following induction of ischemia or sham treatment. CFU-fibroblasts (F), CFU-granulocyte, erythroid, macrophage, megakaryocyte (GEMM), CFU-granulocyte, macrophage (GM), and CFU-macrophage (M) were scored; n=5-6, \* p<0.05.

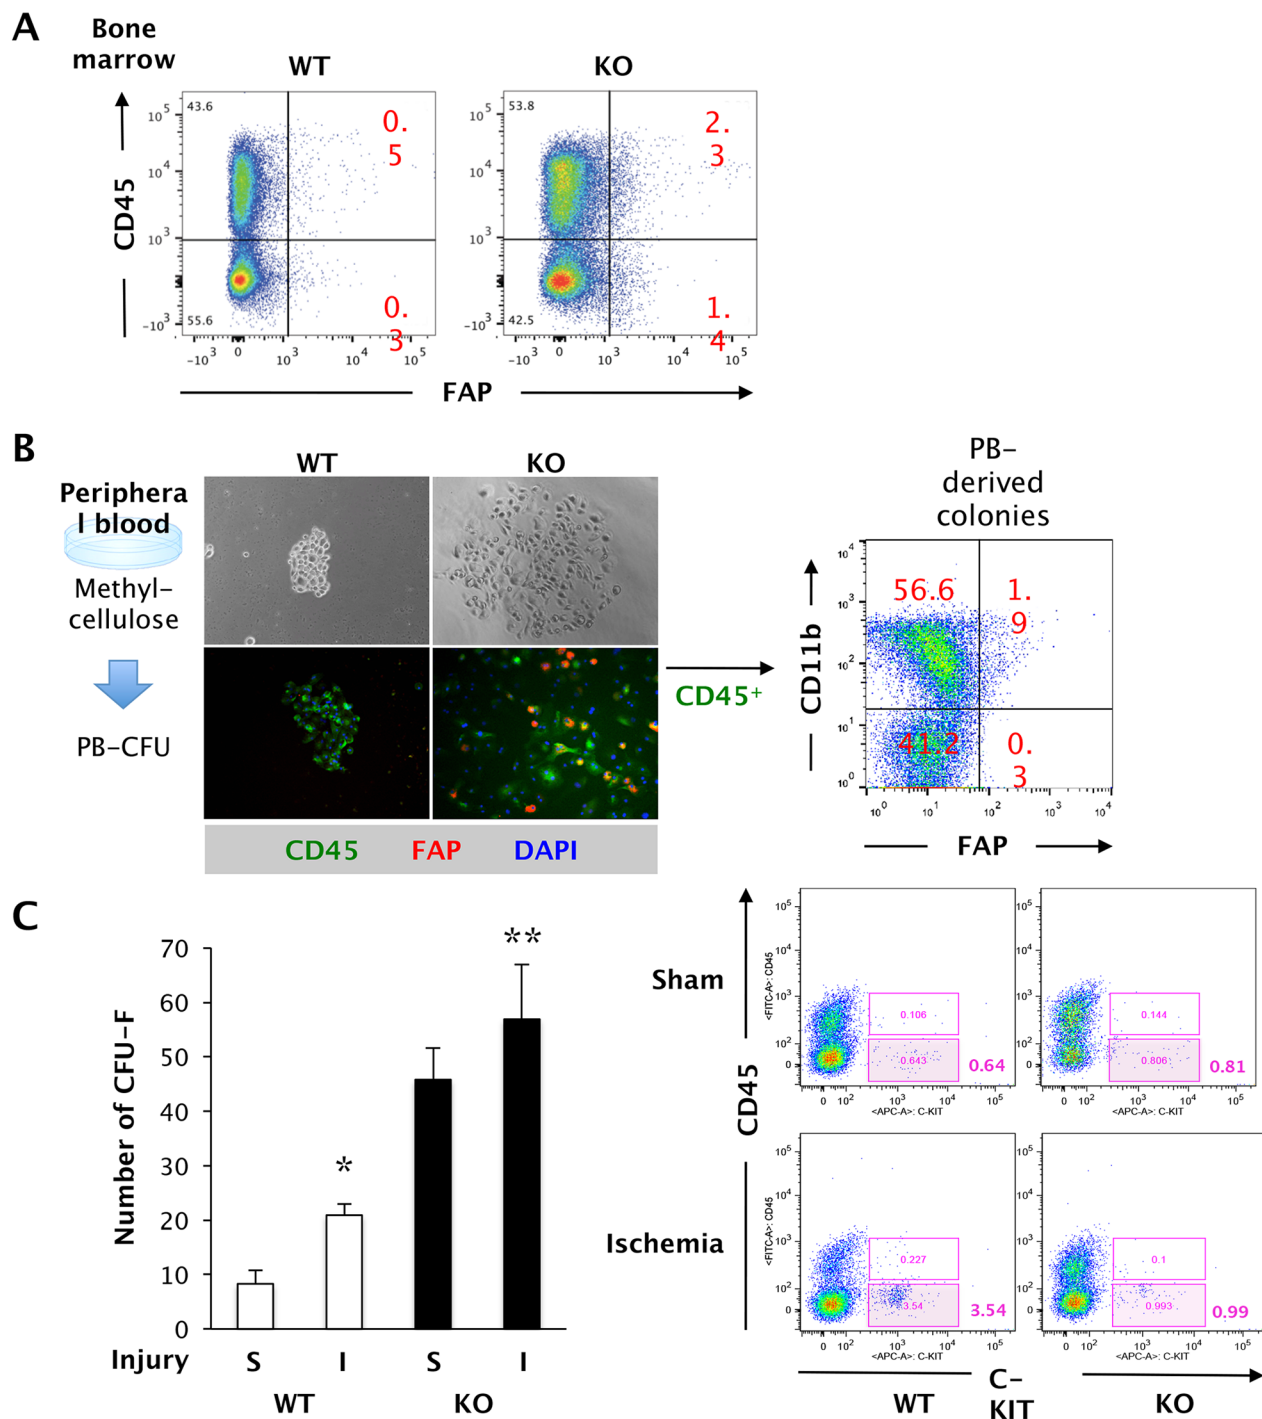

**Supplementary Figure 4: Fibroblast and fibrocyte progenitors in the bone marrow and peripheral blood of miR-25-93-106b KO and WT mice.** **A.** Flow cytometry of BM CD45<sup>+</sup>FAP<sup>+</sup> fibroblasts and CD45<sup>+</sup>FAP<sup>+</sup> fibrocytes. **B. Left:** Adherent flat fibroblast/fibrocyte colonies (CFU-F) derived from 100 $\mu$ l of lysed peripheral blood grown in methylcellulose. Bright field images indicating the colony sizes in miR-25-93-106b KO and WT mice (top). Immunostaining of CFU-F (bottom). **Right:** flow cytometry of CD45<sup>+</sup> peripheral blood-derived colonies. **C.** Quantification of peripheral blood CFU-F (left) and subsequent analysis by flow cytometry (right) following induction of ischemia (I) or sham (S) treatment; n=7, \* p<0.05 for WT-I vs WT-S; \*\* p<0.05 for miR-KO-S vs WT-S.

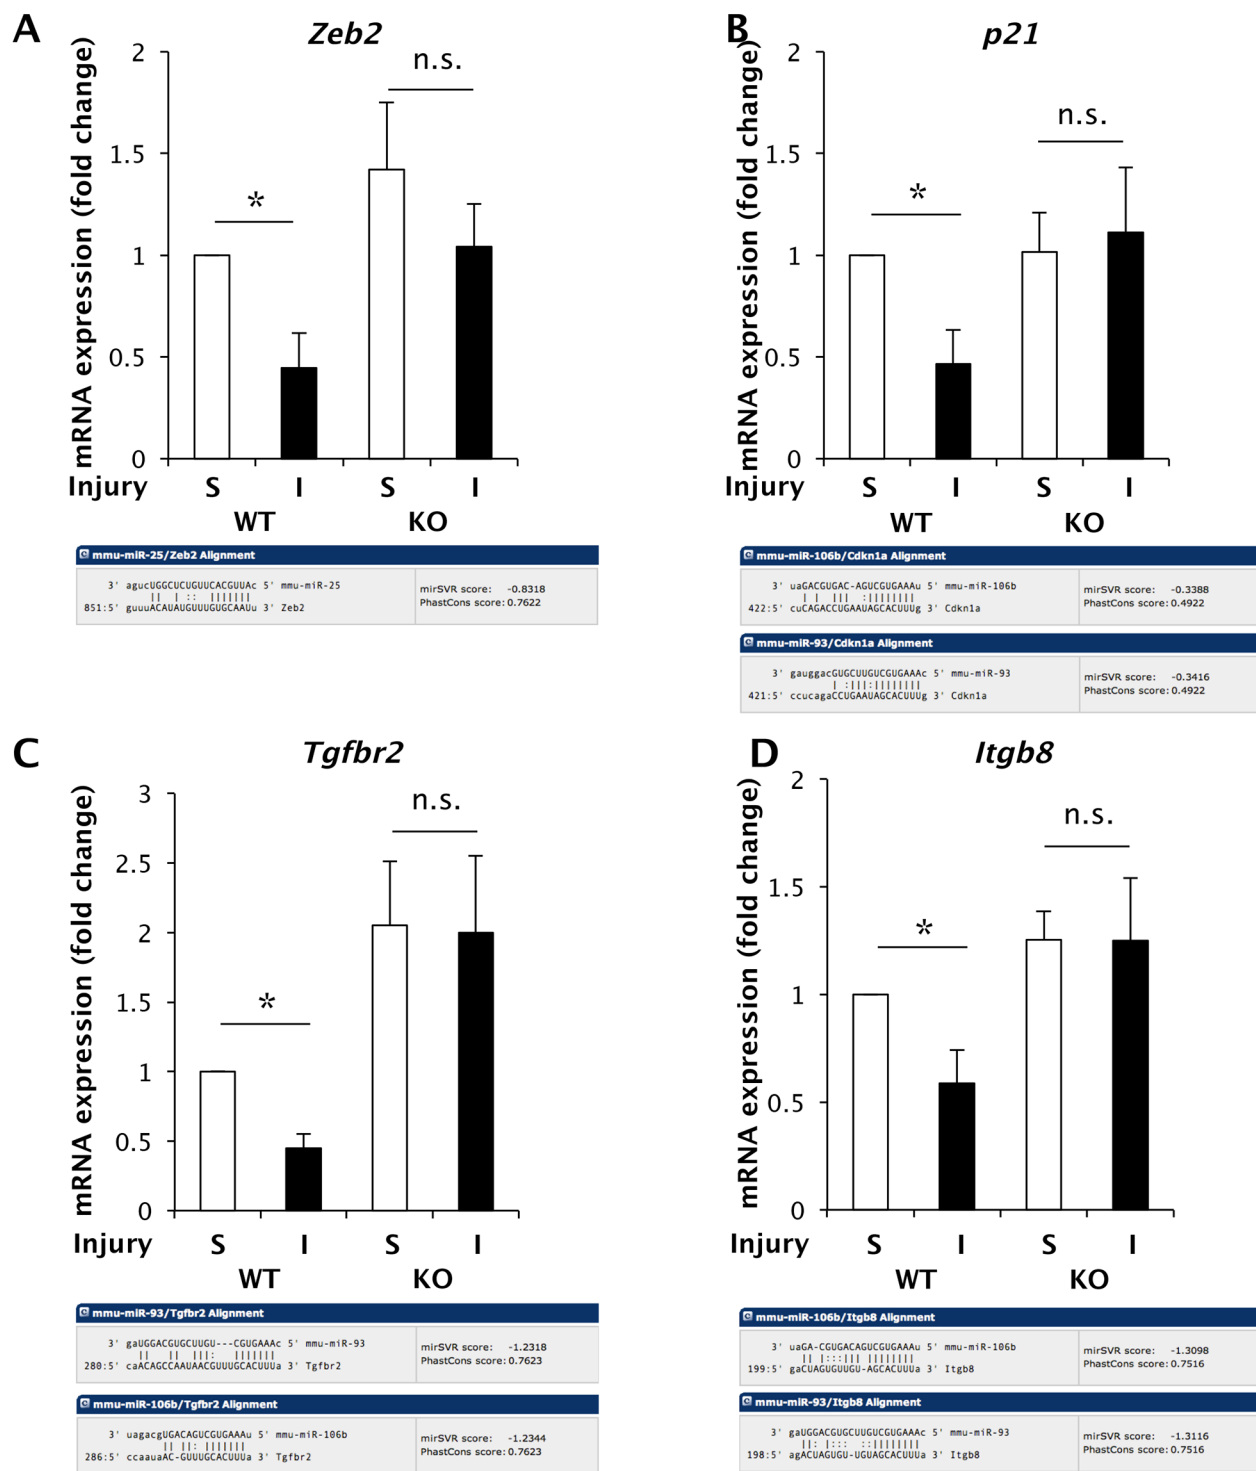

**Supplementary Figure 5: Regulation of miR-25-93-106b cluster targets in the BM stromal niche *in vivo*.** CD45<sup>-</sup> BM cells from miR-25-93-106b<sup>-/-</sup> (KO) vs WT mice following induction of ischemia (I) or sham (S) treatment for 48 hours were sorted and analyzed for established and putative target genes. The *in silico* prediction for the selected target genes is depicted underneath the quantification. Expression of **A. Zeb2**, **B. p21** (*Cdkn1a*), **C. Tgfr2**, and **D. Itgb8** in CD45<sup>-</sup> BM cells; n=4-5, \* p<0.05 for WTI vs. WTS.

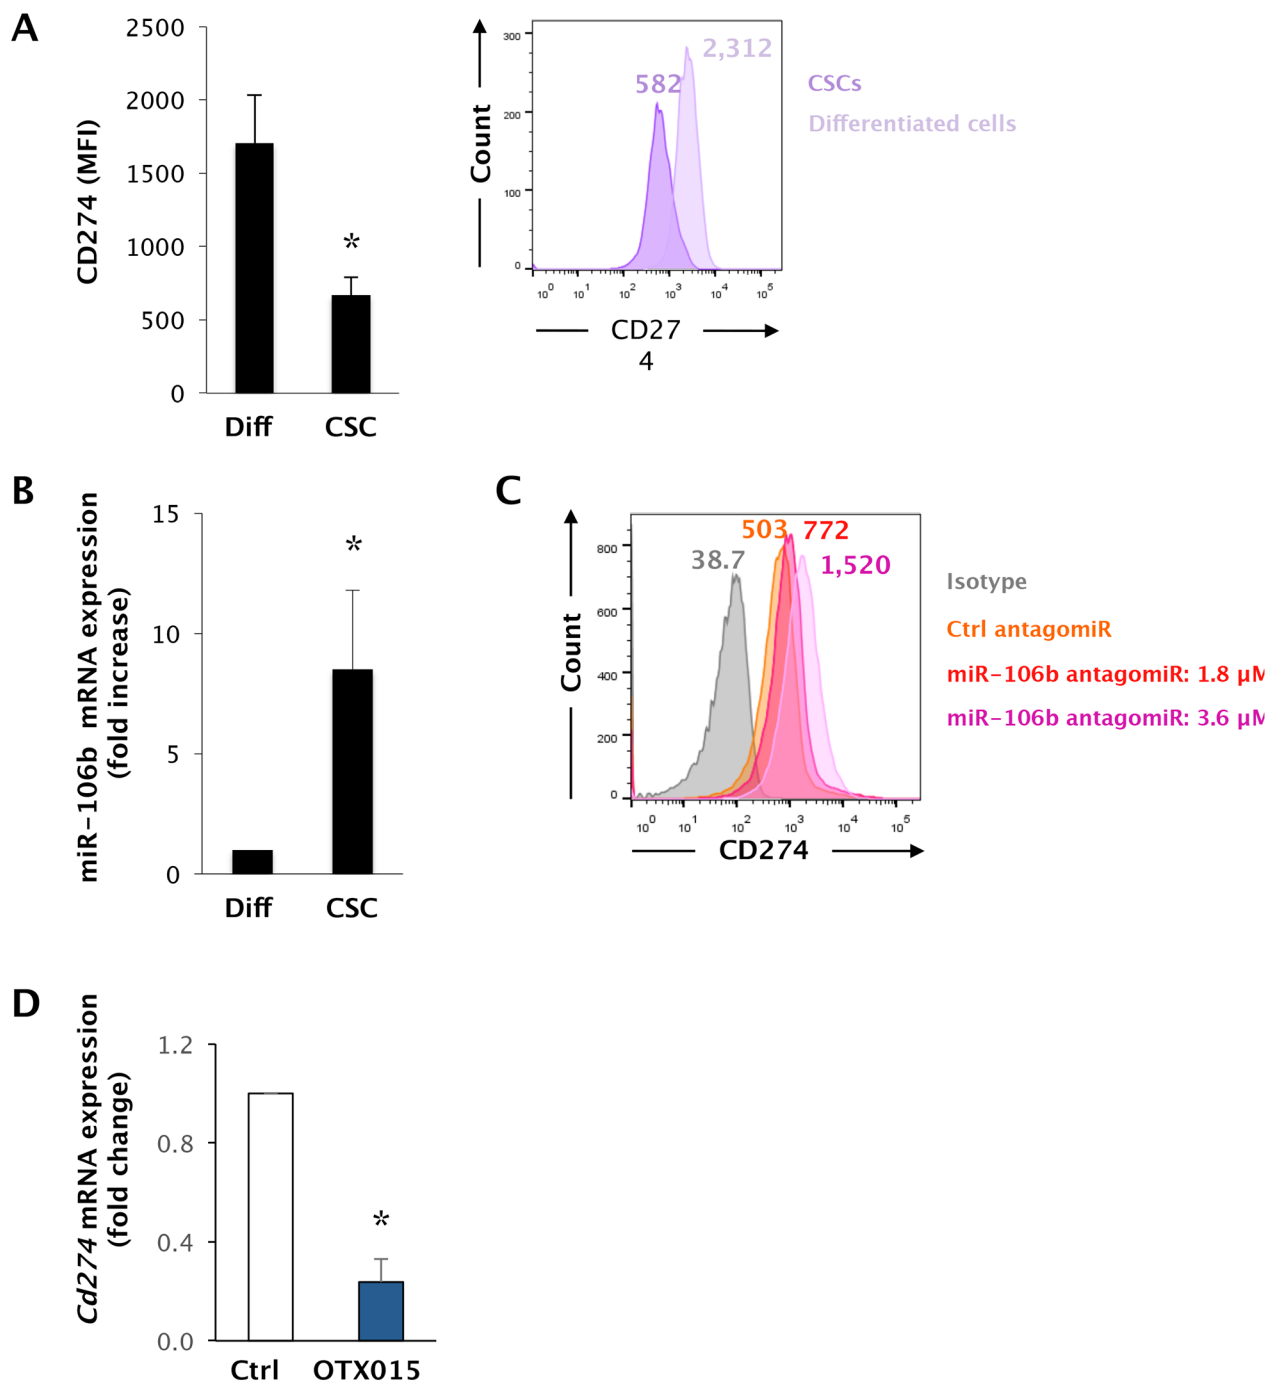

**Supplementary Figure 6: Regulation of CD274 in human neoplastic cells.** **A.** CD274 and **B.** inverse miR-106b expression in pancreatic cancer stem cells (CSC) and differentiated (Diff) cancer cells of human PDAC cultures; n=3, p<0.05. MFI values are displayed in the histogram. **C.** CD274 expression in human cancer cells following treatment with miR-93 and miR-106b antagomiRs for 20 h. The mean fluorescence intensity (MFI) is annotated in the histogram. **D.** Effect of treatment of primary PDAC cells with 500nM OTX for 72 hours on the target gene cd274, n=6, \* p<0.05.

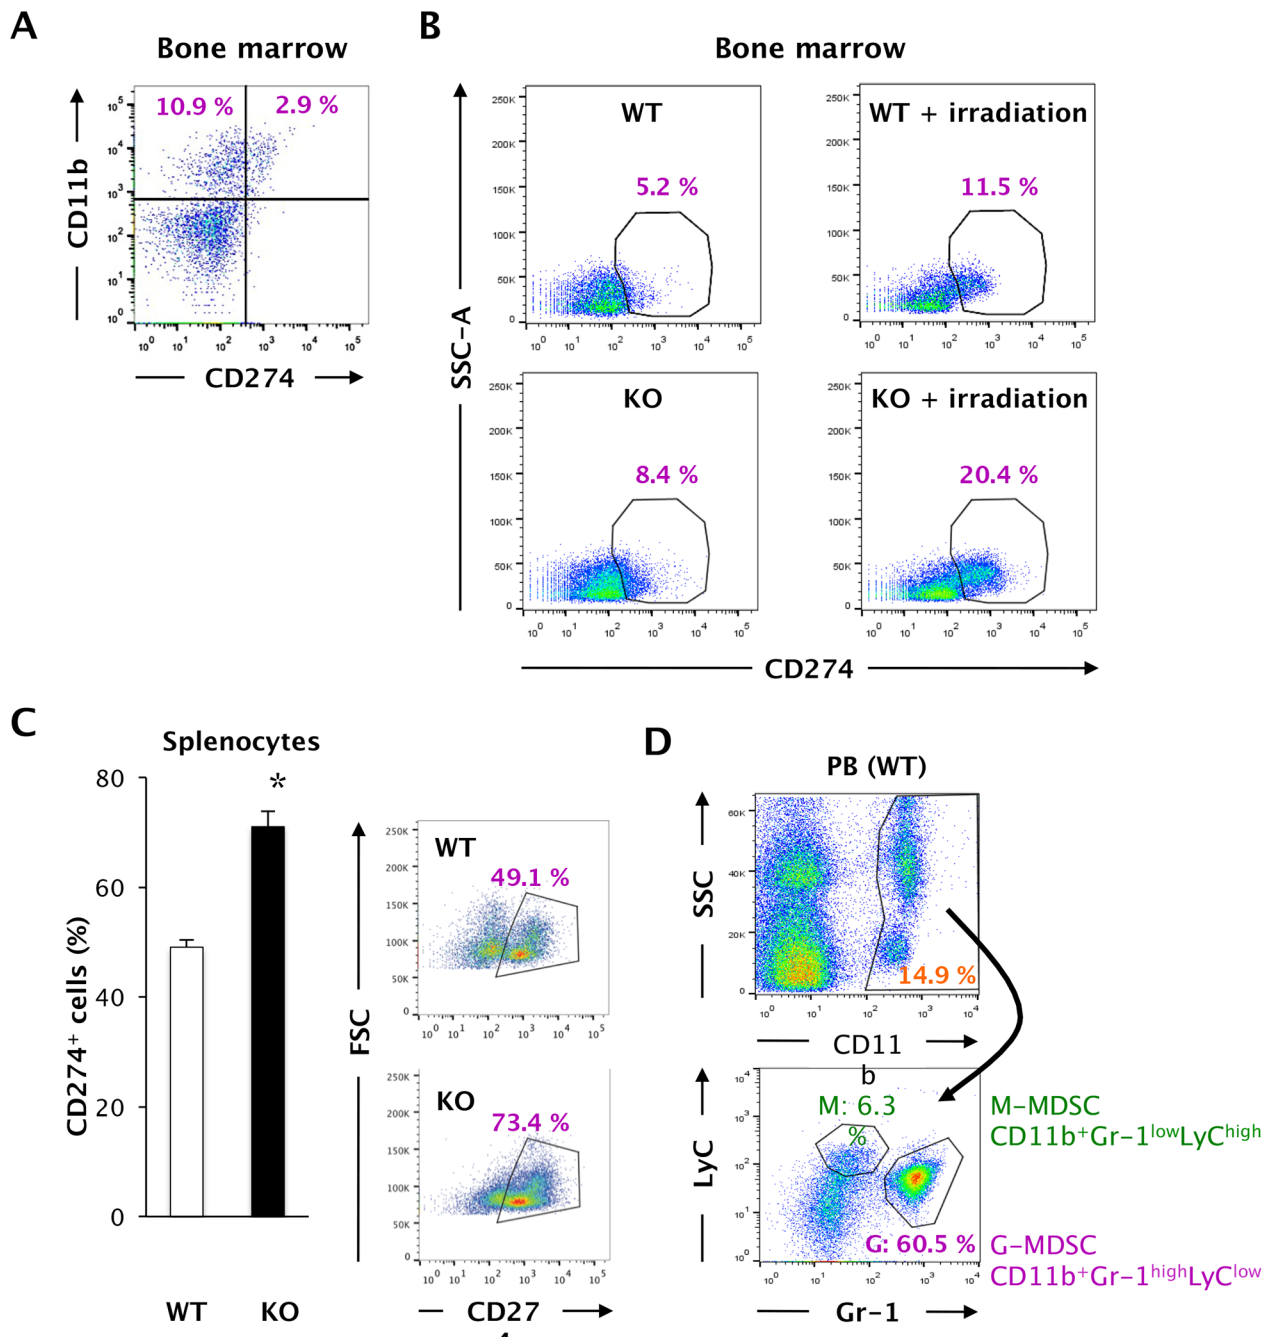

**Supplementary Figure 7: Regulation of the miR-25-93-106b target CD274 in bone marrow (BM) myeloid CD11b<sup>+</sup> cells, splenocytes, and MDSC.** **A.** Representative flow cytometry plots for CD274 expression in CD11b<sup>+</sup> BM cells. **B.** Representative flow cytometry of CD274 expression in BM cells 6 hours following total body irradiation. **C.** Expression of CD274 in splenocytes; quantification (left) and representative flow cytometry (right); n=4, \* p<0.05. **D.** Flow cytometry gating strategy for M-MDSC and G-MDSC in peripheral blood. Further analysis for CD274 expression is shown in Figure 7C.

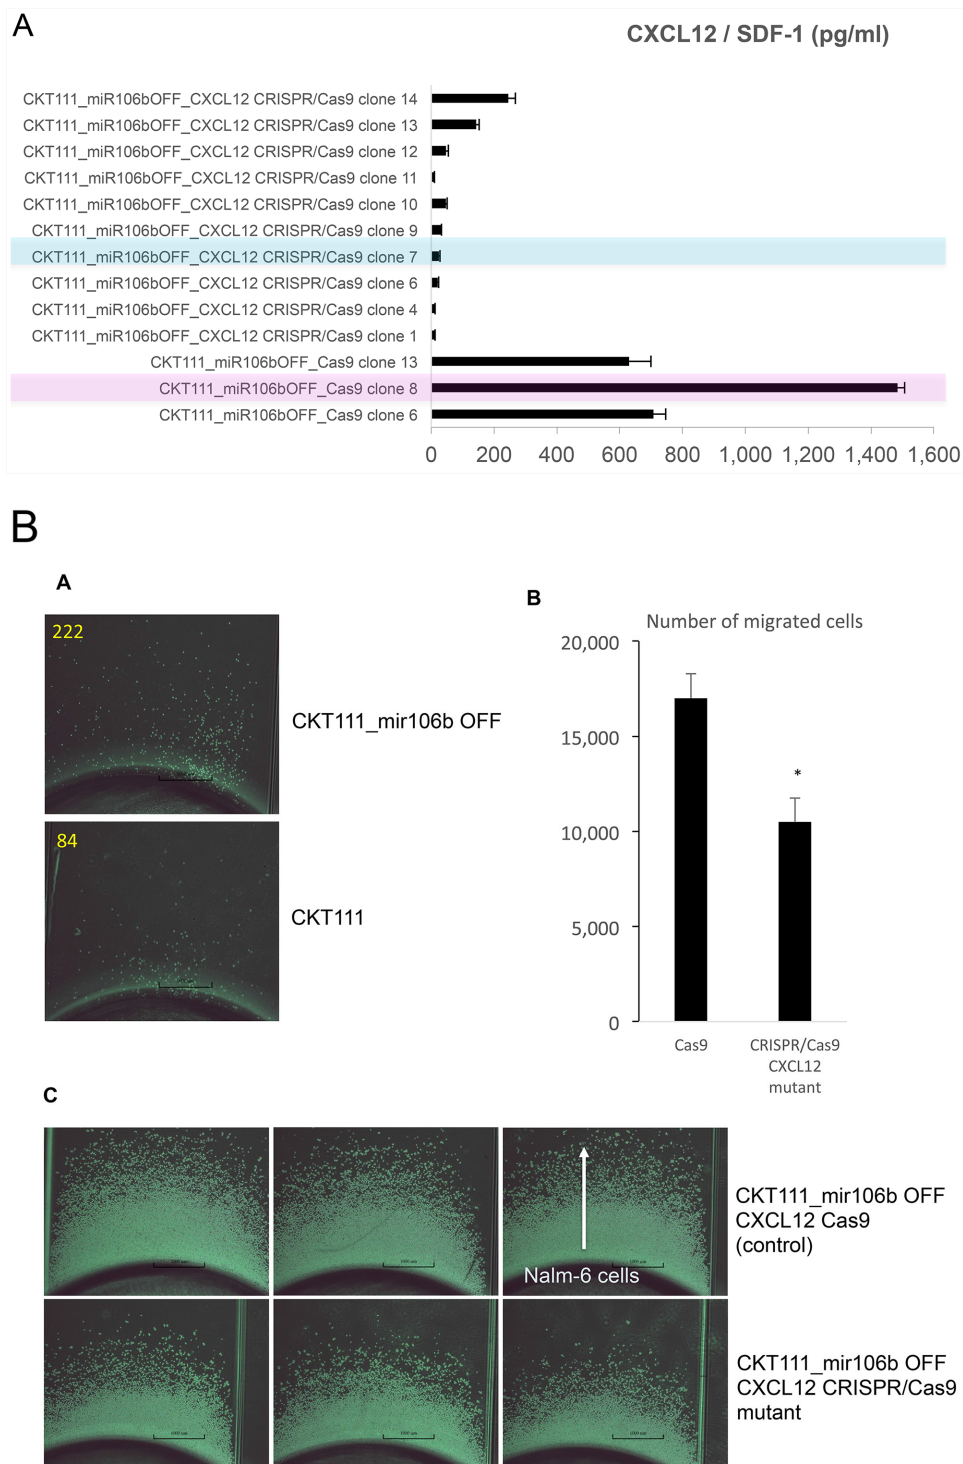

**Supplementary Figure 8: Generation and validation of CXCL12-deficient miR106b OFF clones.** PDAC-derived stromal cell rich CKT111 miR106b OFF cells underwent CRISPR / Cas9 gene editing to generate CXCL12 mutants deficient in the production of CXCL12 as measured by ELISA (n=3). In the next experiments we used the CXCL12-deficient clone 7 (blue) and the CXCL12-competent clone 8 (red). Migration assay using CXCL12-deficient versus CXCL12-competent miR-106b OFF cells. **A.** Migration of  $1 \times 10^3$  Nalm-6 leukemia cells towards stroma rich CKT111 PDAC cells with or without miR-106b knockdown (miR-106b OFF). The number of migrated cells are given in yellow. **B.** Quantification of the migration of  $1 \times 10^5$  Nalm-6 leukemia cells towards CXCL12-deficient or CXCL12-competent miR-106b OFF CKT111 PDAC cells located at the end of the migration channel; n=3, \* p<0.05. **C.** Representative images for the migration of  $1 \times 10^5$  Nalm-6 leukemia cells towards CXCL12-deficient or CXCL12-competent miR-106b OFF CKT111 PDAC cells are shown. An arrow indicates the direction of Nalm-6 cell migration.



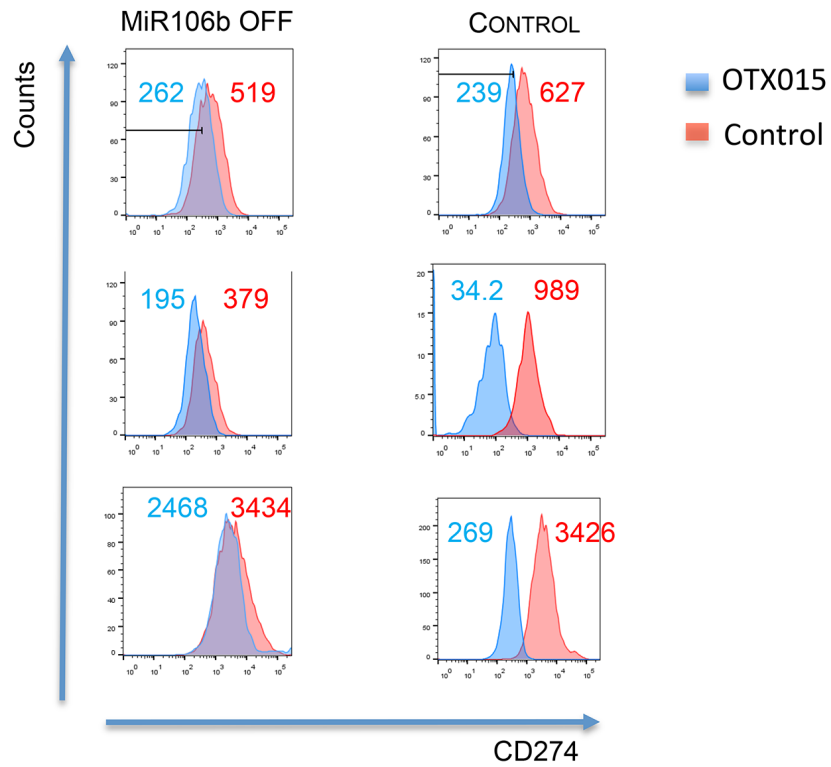

**Supplementary Figure 9: Expression of CD274 in response to treatment with OTX015 in the presence or absence of miR-106b (miR-106b OFF).** Different stroma rich CKT111 PDAC clones were treated with 500nM OTX015 or control (ethanol) for 72h. The marker in the top panels indicates the isotype control.

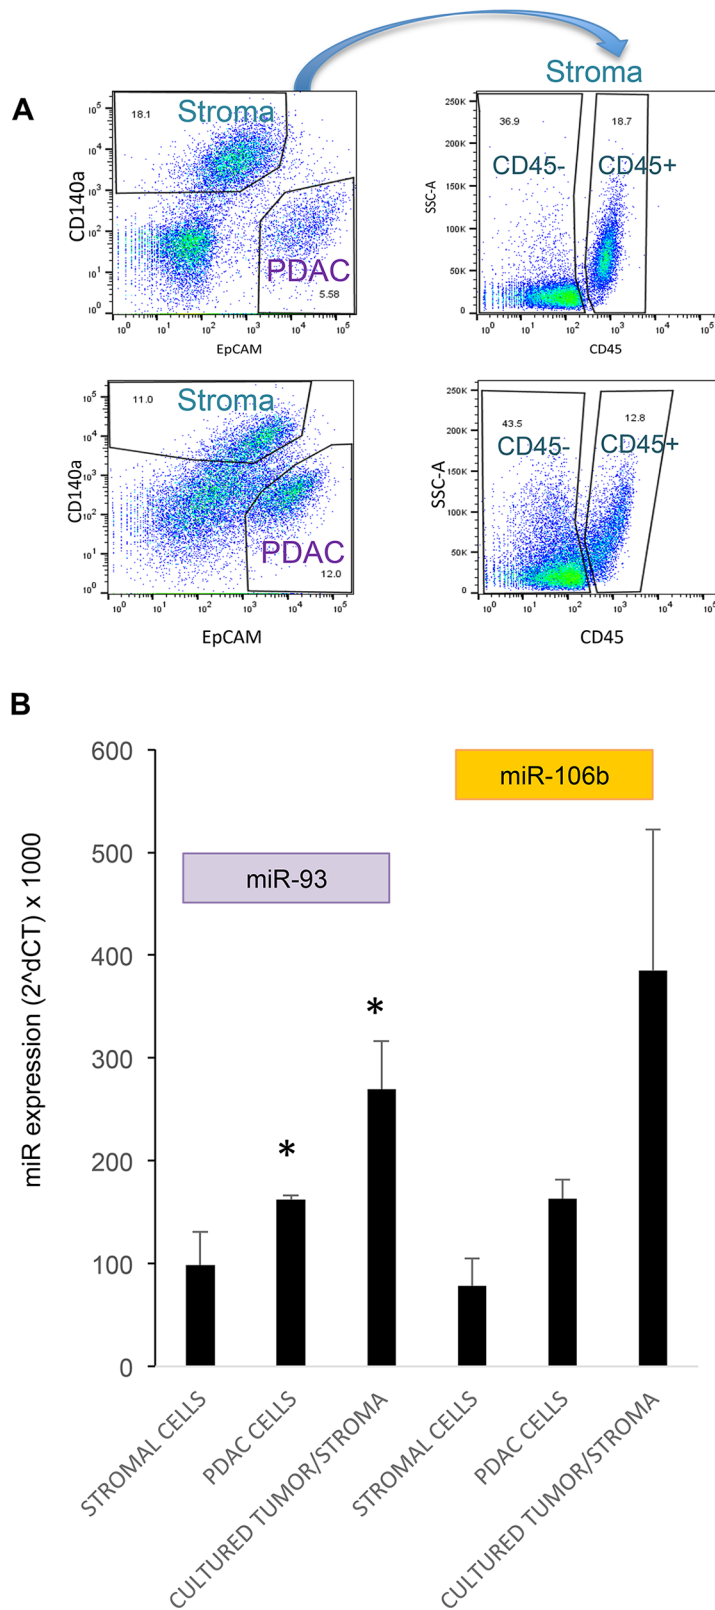

**Supplementary Figure 10: Assessment of the expression of members of the miR-25-93-106b cluster in freshly sorted cancer vs stromal cells. A.** Stromal cells were sorted for CD140a and further analyzed for CD45, while cancer cells were sorted for EpCAM. **B.** MiR expression was determined by qRT-PCR from three different KPC tumours (the sorting strategy is shown for two tumours; n=3, \* p<0.05).

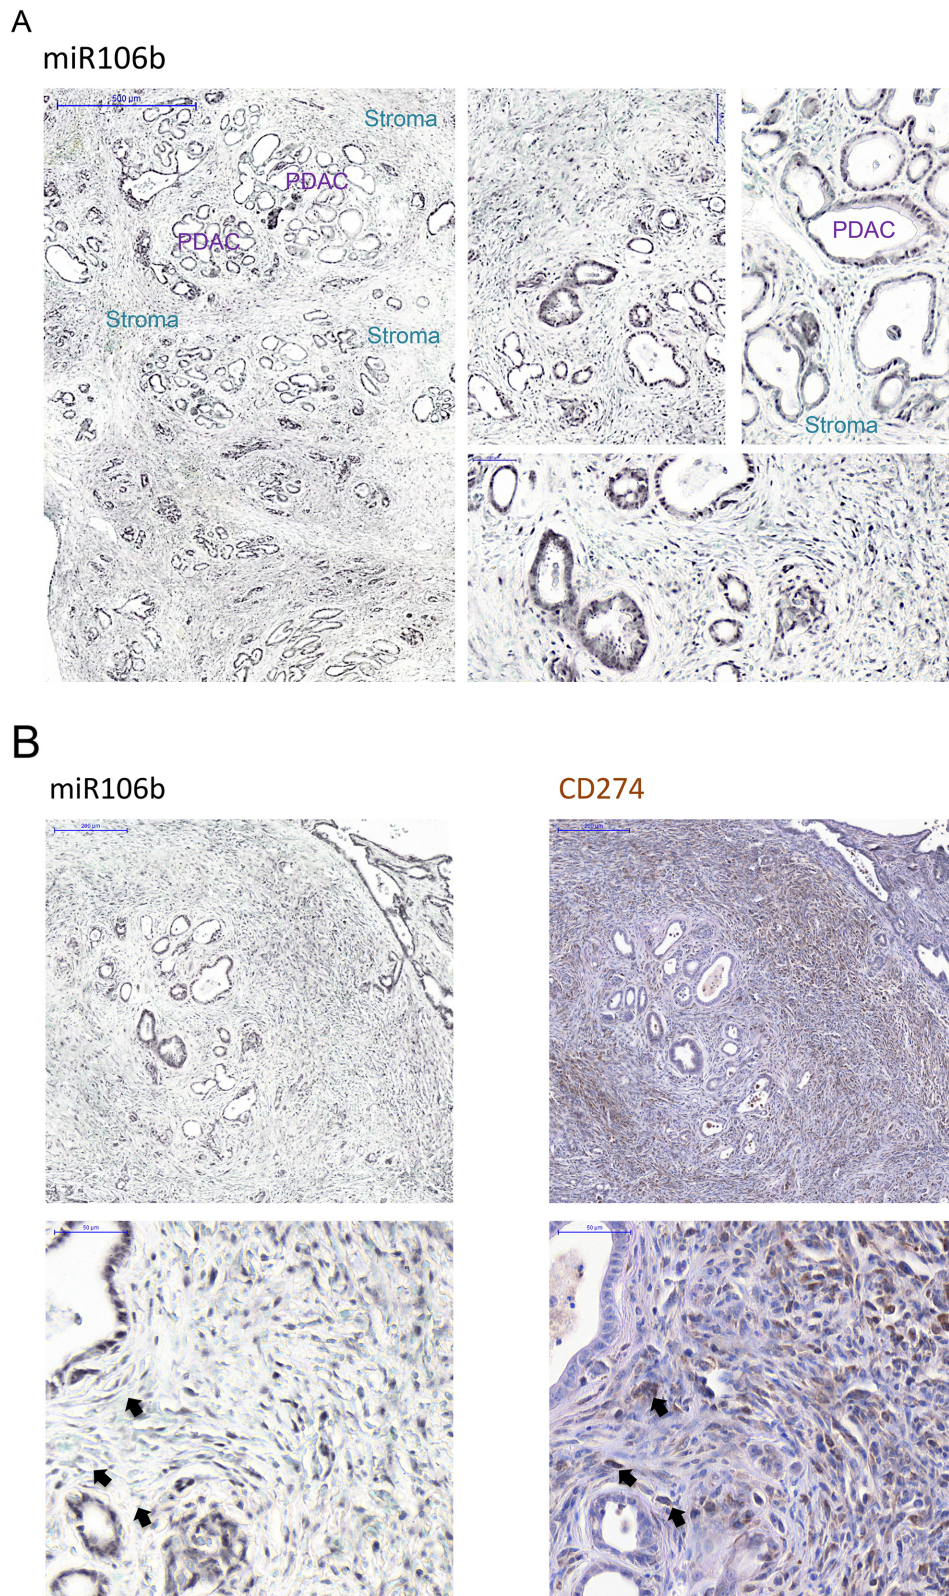

**Supplementary Figure 11: A.** *In situ* hybridization (ISH) for miR-106b in murine PDAC tumours. MiR-106b is expressed in both cancer and stromal compartments of the tumour. **B.** MiR-106b inversely regulates its targets in PDAC tumours. We performed ISH for miR-106b in a murine PDAC tumour. IHC for CD274 is performed on consecutive sections and shows inverse regulation mainly in the stromal cell compartment (arrows indicate examples) (*Continued*)

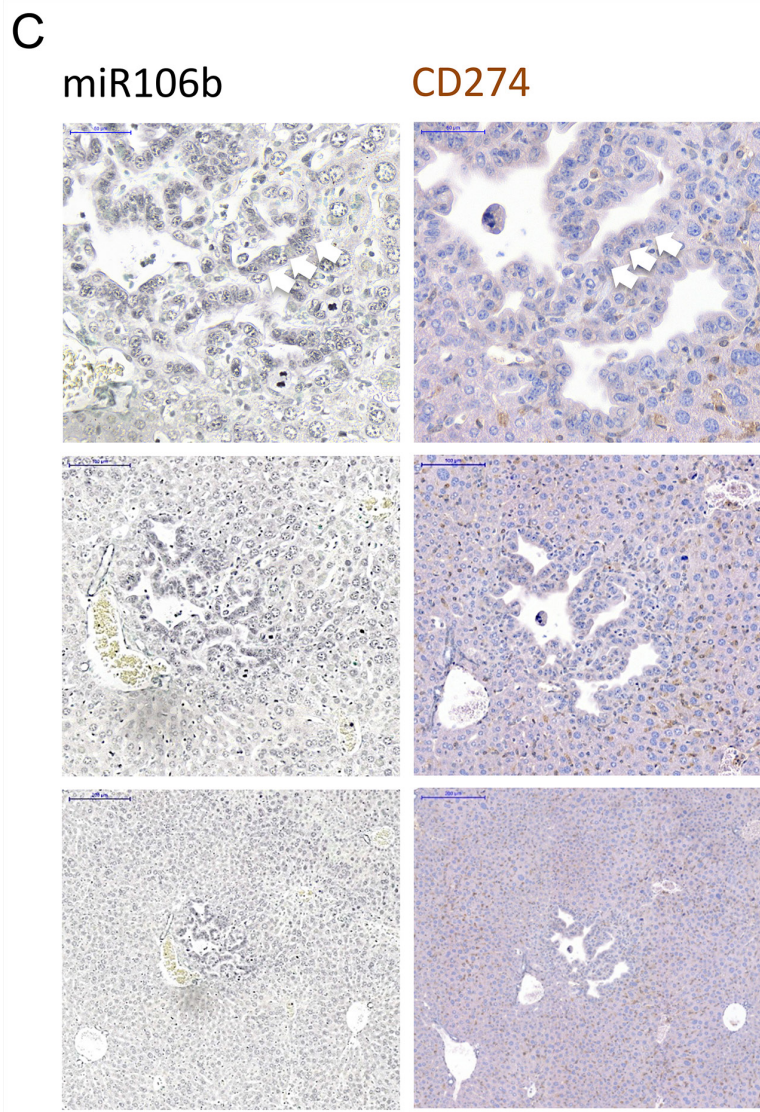

**Supplementary Figure 11: (Continued) C.** MiR-106b inversely regulates its targets in PDAC-derived liver metastasis. We performed ISH for miR-106b in murine liver metastases. IHC for CD274 is performed on consecutive sections and shows inverse regulation in the cancer cell compartment (arrows indicate examples).

Supplementary Table 1: List of utilized primers

| Gene                  | Forward primer            | Reverse primer            |
|-----------------------|---------------------------|---------------------------|
| <b>29 Rps</b>         | CGGTCTGATCCGCAAATACG      | AGGTCGCTTAGTCCAACCTAAT    |
| <b>HPRT</b>           | GTTGGGCTTACCTCACTGCT      | TCATCGCTAATCACGACGCT      |
| <b>GAPDH</b>          | CCGGGTTCCCTATAAATACGGACTG | CCAATACGGCCAAATCCGTT      |
| <b>CXCL12 (SDF-1)</b> | CAGATTGTTGCACGGCTGAA      | CCTCGGGGGTCTACTGGAAA      |
| <b>PD-L1 (CD274)</b>  | TCTCCTCGCCTGCAGATAGT      | TAAACGCCCGTAGCAAGTGA      |
| <b>ZEB2</b>           | GGCAAGGCCTTCAAGTACAA      | AAGCGTTTCTTGCAGTTTGG      |
| <b>P21</b>            | ACCAGCTGTGGGGTGAGGAGG     | TGCCTGTGGCACCTTTTATTCTGCT |
| <b>TgfbR2</b>         | TCCCAAGTCGGTTAACAGTGA     | TGCAGGACTTCTGGTTGTCG      |
| <b>ITGB8</b>          | GTGTGCTGGGCATGGGGAGTG     | GTGCCTCTCCCGCTGCAAACCT    |
